# Supplementary material
Source: PubMed Central journal article supplement (PMC6176590)
Supplement: pnas.1812756115.sapp.pdf [file pnas.1812756115.sapp.pdf]

## Supplementary information

### Supplementary Tables 1-5

*Supplementary Table 1.* Proteins tested in the study. (#) EHEE is an artificial protein for which only a theoretical 3D model is available. (\$) Highlighted in green are the two ILBP proteins used in this study, for which we made homology models based on PDB 2LBA. Highlighted in gray are S6 and four of its variants; there are no structures available for the charge mutants.

| <b>Protein</b>  | <b>Reference</b> | <b>PDB ID</b>       | <b>Length<br/>(residues)</b> | <b>Molecular<br/>weight (kDa)</b> | <b>Net charge</b> |
|-----------------|------------------|---------------------|------------------------------|-----------------------------------|-------------------|
| FSD1            | (1)              | 1fsd                | 28                           | 3.48                              | +5                |
| WW domain       | (2)              | 2m8i                | 35                           | 4.08                              | +4                |
| EHEE            | (3)              | model <sup>#</sup>  | 40                           | 4.94                              | +1                |
| Protein G       | (4)              | 3gb1                | 56                           | 6.1                               | -4                |
| Cam Frag        | (5)              | 2hf5                | 69                           | 7.83                              | -9                |
| SOD1            | (6)              | 4bcz                | 110                          | 11.10                             | -3                |
| ILBP            | (7)              | model <sup>\$</sup> | 128                          | 14.40                             | +1                |
| ILBP-tm         | (7)              | model <sup>\$</sup> | 105                          | 11.51                             | +2                |
| S6-wt-(+16/-16) | (8, 9)           | 2kjb                | 101                          | 11.97                             | 0                 |
| S6-(+16/-9)     | (8, 9)           | ----                | 101                          | 11.96                             | +7                |
| S6-(0)          | (8, 9)           | ----                | 101                          | 10.96                             | 0                 |
| S6-(+9/-16)     | (8, 9)           | ----                | 101                          | 11.54                             | -7                |
| S6-(-16)        | (8, 9)           | ----                | 101                          | 10.97                             | -16               |

*Supplementary Table 2.* Sequences of the longest construct tested for each protein domain (orange). Shorter constructs were obtained by shortening of the (GS)<sub>n</sub> linker (purple) For small domains, an unstructured segment from the *E. coli* LepB protein (light blue) was appended to the N terminus in order to make the constructs easy to identify by SDS-PAGE. The arrest peptide (green) is followed by a 23-residue C-terminal tail (light blue), also derived from the LepB protein.

>Lep-154-1fsd-SecM-L60 (Not listed in Uniprot, artificial protein, PDB;1fsd)

MANRSFIYEPFQIPSGSMPTLNSTDFILVEKFAYGIKDPIYQKTLIETGHPKRGDIVVFKYPEDP  
KLDYIKRAVGLPGDKVITYDPVSKELTIQPGCSSGQACENALPVTYSNVEPSDFVQTFSTRNGEAT  
SGFFEVPKQETKENGIRLSETSGSGSQYTAIKGRTRNEKELRDFIEKFKGRSGSGSGSGSGSGS  
SGSGSGSGSGSGSGSGSGSGSGSGSGSGSGSFPSTPVWISQAQGIRAGPGSSDKQEGEWPTGLRLSR  
IGGIH\*

Number of amino acids: 28  
Molecular weight: 3.48 kDa  
Arg+Lys=4+5=9  
Glu+Asp=3+1=4  
Net charge at pH 7:+5

>WW domain UniProtKB - Q13526 (PIN1\_HUMAN)

MANRSFIYEPFQIPSGSMPTLNSTDFILVEKFAYGIKDPIYQKTLIETGHPKRGDIVVFKYPEDP  
KLDYIKRAVGLPGDKVITYDPVSKELTIQPGCSSGQACENALPVTYSNVEPSDFVQTFSTRNGEAT  
SGFFEVPKQETKENGIRLSETSGSGSKLPPGWEKRMSRSSGRVYYFNHITNASQWERPSGGSGSGS  
GSGSGSGSGSGSGSGSGSGSGSGSGSGSGSGSFPSTPVWISQAQGIRAGPGSSDKQEGEWPT  
GLRLSRIGGIH\*

Number of amino acids: 35  
Molecular weight: 4.08 kDa  
Arg+Lys=4+2=6  
Glu+Asp=2+0=2  
Net charge at pH 7:+4

>EHEE (Not listed in Uniprot, artificial protein,(3))

MANRSFIYEPFQIPSGSMPTLNSTDFILVEKFAYGIKDPIYQKTLIETGHPKRGDIVVFKYPEDP  
KLDYIKRAVGLPGDKVITYDPVSKELTIQPGCSSGQACENALPVTYSNVEPSDFVQTFSTRNGEAT  
SGFFEVPKQETKENGIRLSETSGSGSTTRYRFTDEEEARRAAKEWARRGYQVHVTQNGTYWEVEVR  
GSGSGSGSGSGSGSGSGSGSGSGSGSGSGSGSFPSTPVWISQAQGIRAGPGSSDKQ  
EGEWPTGLRLSRIGGIH\*

Number of amino acids: 40  
Molecular weight: 4.94 kDa  
Arg+Lys=7+1=8  
Glu+Asp=6+1=7  
Net charge at pH 7:+1



>ILBP-tm UniProtKB - P50119 (FABP6\_RABIT) mutant

MAFTGKFEMGGSGIVTEIKQDGDFTWSHHYSGGQIMTNKFTIGKESEIQTFGGKKFKAV  
VNMEGGKVVANFPNYQHTSEIKGDKLVEVSSIGGVTYERVSKRLAGSGSGSGSGSGSGSG  
SGSGSGSGSGSGSGSGSGSGSGSGSGSGSGFSTPVWISQAQGIRAGPGSSDKQEGEWPTGLR  
LSRIGGIH\*

Number of amino acids: 105  
Molecular weight: 11.51 kDa  
Arg+Lys=2+11=13  
Glu+Asp=8+3=11  
Net charge at pH 7:+2

>S6-SecM(*Ec*) AP UniProtKB - P23370 (RS6\_THETH)

MRRYEVNIVLNPNDQSQLALEKEIIQRALENYGARVEKVEELGLRRLAYPIAKDPQGYF  
LWYQVEMPEDRVNDLARELRIRDNVRRVMVVKSQEPFLANAGSGSGSGSGSGSGSGSGSGS  
SGSGSGSGSGSGSGSGSGSGSGSGSGSGSGFSTPVWISQAQGIRAGPGSSDKQEGEWPTGLRLSRI  
GGIH\*

Number of amino acids: 101  
Molecular weight: 11972.77  
Arg+Lys=12+4=16  
Glu+Asp=11+5=16  
Net charge at pH 7:0

>S6<sup>+16-9</sup>-SecM(*Ec*) AP UniProtKB - P23370 (RS6\_THETH) mutant

MRRYEVNIVLNPNDQSQLALEKQIIQRALENYGARVQKVQELGLRRLAYPIAKDPQGYF  
LWYQVEMPQNRVNDLARQLRIRNRRVMVVKSQEPFLANAGSGSGSGSGSGSGSGSGSGS  
SGSGSGSGSGSGSGSGSGSGSGSGSGSGSGFSTPVWISQAQGIRAGPGSSDKQEGEWPTGLRLSRI  
GGIH\*

Number of amino acids: 101  
Molecular weight: 11965.88  
Arg+Lys=12+4=16  
Glu+Asp=6+3=9  
Net charge at pH 7:+7

>S6<sup>0</sup>-SecM(*Ec*) AP UniProtKB - P23370 (RS6\_THETH) mutant

MSSYQVNIIVLNPNDQSQLALQSQIIQSALQNYGASVQSVQQLGLSSLAYPIASNPOGYF  
LWYQVQMPQNSVNNLASQLSISNNVSSVMVVSSQQPFLANAGSGSGSGSGSGSGSGSGSGS  
SGSGSGSGSGSGSGSGSGSGSGSGSGSGSGFSTPVWISQAQGIRAGPGSSDKQEGEWPTGLRLSRI  
GGIH\*

Number of amino acids: 101  
Molecular weight: 10963.32  
Arg+Lys=0+0=0  
Glu+Asp=0+0=0  
Net charge at pH 7:0

> S6<sup>+9-16</sup>-SecM(*Ec*) AP UniProtKB - P23370 (RS6\_THETH) mutant

MSRYEVNIVLNPNDQSQLALESEIIQRALENYGARVESVEELGLSRLAYPIAKDPQGYF  
LWYQVEMPEDRVNDLASELRISDNVRSVMVVKSQEPFLANAGSGSGSGSGSGSGSGSGSGS  
GSGSGSGSGSGSGSGSGSGSGSGSFSTPVWISQAQGIKAGPGSSDKQEGEWPTGLRLSRI  
GGIH\*

Number of amino acids: 101  
Molecular weight: 11545.03  
Arg+Lys=7+2=0  
Glu+Asp=11+5=16  
Net charge at pH 7: -7

>S6<sup>-16</sup>-SecM(*Ec*) AP UniProtKB - P23370 (RS6\_THETH) mutant  
MSSYEVENIVLNPNDQSQLALESEIIQSALENYGASVESVEELGLSRLAYPIASDPQGYF  
LWYQVEMPEDRVNDLASELSISDNVSSVMVVSSQEPFLANAGSGSGSGSGSGSGSGSGSGS  
GSGSGSGSGSGSGSGSGSGSGSGSFSTPVWISQAQGIKAGPGSSDKQEGEWPTGLRLSRI  
GGIH\*

Number of amino acids: 101  
Molecular weight: 10979.08  
Arg+Lys=0+0=0  
Glu+Asp=11+5=0  
Net charge at pH 7: -16

>S6-SecM(*Ms*) AP UniProtKB - P23370 (RS6\_THETH) mutant  
MRRYEVENIVLNPNDQSQLALEKEIIQRALENYGARVEKVEELGLRRLAYPIAKDPQGYF  
LWYQVEMPEDRVNDLARELRIRDNVRVMVVKSQESGSGSGSGSGSGSGSGSGSGSGSGG  
SGSGSGSGSGSGSGSGSGSGSGSHAPIRGSPGSSDKQEGEWPTGLRLSRIGGIH\*

Number of amino acids: 95  
Molecular weight: 11359.06  
Arg+Lys=12+4=16  
Glu+Asp=11+5=16  
Net charge at pH 7:0

>S6<sup>-16</sup>-SecM(*Ms*) AP UniProtKB - P23370 (RS6\_THETH)  
MSSYEVENIVLNPNDQSQLALESEIIQSALENYGASVESVEELGLSRLAYPIASDPQGYF  
LWYQVEMPEDRVNDLASELSISDNVSSVMVVSSQESGSGSGSGSGSGSGSGSGSGSGSGG  
SGSGSGSGSGSGSGSGSGSGSGSHAPIRGSPGSSDKQEGEWPTGLRLSRIGGIH\*

Number of amino acids: 95  
Molecular weight: 10365.36  
Arg+Lys=0+0=0  
Glu+Asp=11+5=16  
Net charge at pH 7:-16

*Supplementary Table 3.* Thermodynamic stabilities ( $\Delta G_{D-N}$ ) in kcal/mol and  $\log k_f$  values (measured at 25 °C in 50 mM MES buffer, pH 6.2) for 16 single-point mutations in protein S6 (10), and fraction full length ( $f_{FL}$ ) for the corresponding nascent chain mutants obtained with the SecM(*Ms*) AP at  $L = 30$  residues. The  $f_{FL}$  measurements are averages of 3 independent replicates and their corresponding standard deviations are shown.

|      | $\Delta G_{D-N}$ | $\log k_f$ | $f_{FL}$ | ST dev. |
|------|------------------|------------|----------|---------|
| WT   | 8.97             | 2.64       | 0.84     | 0.005   |
| V6A  | 5.34             | 1.86       | 0.28     | 0.012   |
| I8A  | 4.82             | 1.61       | 0.24     | 0.011   |
| L10A | 4.37             | 1.83       | 0.16     | 0.011   |
| L19A | 6.36             | 2.42       | 0.53     | 0.031   |
| I26A | 5.94             | 1.86       | 0.33     | 0.038   |
| L30A | 5.31             | 2.03       | 0.41     | 0.026   |
| V37A | 6.31             | 2.39       | 0.42     | 0.034   |
| L61A | 5.55             | 2.4        | 0.20     | 0.012   |
| Y63A | 5.08             | 2.3        | 0.55     | 0.024   |
| V65A | 5.64             | 2.16       | 0.39     | 0.051   |
| V72A | 7.56             | 2.59       | 0.80     | 0.008   |
| L75A | 6.89             | 2.3        | 0.60     | 0.011   |
| L79A | 4.21             | 2.27       | 0.23     | 0.011   |
| V85A | 5.51             | 2.51       | 0.54     | 0.007   |
| V88A | 6.88             | 2.39       | 0.69     | 0.009   |
| V90A | 6.12             | 2.42       | 0.67     | 0.013   |

*Supplementary Table 4* Thermodynamic stabilities ( $\Delta G_{D-N}$ ) in kcal/mol,  $\log k_f$ , and  $\log k_u$  values for S6 variants of different net charge (9). In the *in vitro* studies, the S6<sup>0</sup> mutant (called S6<sup>+1</sup> in Ref. 9) was obtained by analyzing the S6<sup>-16</sup> mutant (called S6<sup>+1-17</sup> in Ref. 9) at pH 2.3.

| S6 version | $\log k_f$ | $\log k_u$ | $\Delta G_{D-N}$<br>kcal/mol |
|------------|------------|------------|------------------------------|
| WT         | 2.53       | -3.51      | 8.24                         |
| +17        | 3.34       | -0.86      | 5.72                         |
| 0          | 3.28       | 0.35       | 3.99                         |
| -16        | 1.48       | -0.64      | 2.89                         |

Supplementary Table 5. Proteins tested in previous studies

| Protein    | Reference | PDB ID | Length (residues) | Molecular weight (kDa) | Net charge |
|------------|-----------|--------|-------------------|------------------------|------------|
| DHFR       | (11)      | 8dfr   | 189               | 21.64                  | +1         |
| PENT       | (12)      | 6fls   | 105               | 12.03                  | -10        |
| Titin I27  | (13)      | 1tit   | 89                | 9.78                   | -6         |
| R15        | (14)      | 1u5p   | 109               | 12.99                  | +1         |
| R16        |           | 1aj3   | 109               | 12.73                  | +1         |
| $\beta$ 16 |           | 3lbx   | 109               | 13.43                  | 0          |
| ADR1a      | (15)      | 2adr   | 29                | 3.47                   | +5         |
| FLN5       | (16)      | 1qfh   | 106               | 11.22                  | -9         |
| TOP7       | (17)      | 1qys   | 95                | 10.75                  | -4         |

### Supplementary References

1. Dahiyat B, Sarisky C, & Mayo S (1997) De novo protein design: towards fully automated sequence selection. *J Mol Biol* 273:789-796.
2. Luh LM, *et al.* (2013) Molecular crowding drives active Pin1 into nonspecific complexes with endogenous proteins prior to substrate recognition. *J Am Chem Soc* 135:13796-13803.
3. Rocklin GJ, *et al.* (2017) Global analysis of protein folding using massively parallel design, synthesis, and testing. *Science* 357:168-175.
4. Kuszewski J, Gronenborn AM, & Clore GM (1996) Improving the quality of NMR and crystallographic protein structures by means of a conformational database potential derived from structure databases. *Protein Sci* 5:1067-1080.



5. Lakowski TM, Lee GM, Okon M, Reid RE, & McIntosh LP (2007) Calcium-induced folding of a fragment of calmodulin composed of EF-hands 2 and 3. *Protein Sci* 16:1119-1132.
6. Danielsson J, *et al.* (2013) Global structural motions from the strain of a single hydrogen bond. *Proc Natl Acad Sci U S A* 110:3829-3834.
7. Rea AM, Thurston V, & Searle MS (2009) Mechanism of ligand-induced folding of a natively unfolded helixless variant of rabbit I-BABP. *Biochemistry* 48:7556-7564.
8. Ohman A, Oman T, & Oliveberg M (2010) Solution structures and backbone dynamics of the ribosomal protein S6 and its permutant P(54-55). *Protein Sci* 19:183-189.
9. Kurnik M, Hedberg L, Danielsson J, & Oliveberg M (2012) Folding without charges. *Proc Natl Acad Sci U S A* 109:5705-5710.
10. Haglund E, Lindberg MO, & Oliveberg M (2008) Changes of protein folding pathways by circular permutation. Overlapping nuclei promote global cooperativity. *J Biol Chem* 283:27904-27915.
11. Nilsson OB, Müller-Lucks A, Kramer G, Bukau B, & von Heijne G (2016) Trigger factor reduces the force exerted on the nascent chain by a cotranslationally folding protein. *J Mol Biol* 428:1356-1364.
12. Notari L, Martinez-Carranza M, Farias-Rico JA, Stenmark P, & von Heijne G (2018) Cotranslational folding of a pentarepeat  $\beta$ -helix protein. *bioRxiv* <https://doi.org/10.1101/255810>.
13. Tian P, *et al.* (2018) The folding pathway of an Ig domain is conserved on and off the ribosome. *BioRxiv* doi: <https://doi.org/10.1101/253013>.

14. Nilsson OB, *et al.* (2017) Cotranslational folding of spectrin domains via partially structured states. *Nat Struct Mol Biol* 24:221-225.
15. Nilsson OB, *et al.* (2015) Cotranslational protein folding inside the ribosome exit tunnel. *Cell reports* 12:1533-1540.
16. Cabrita LD, *et al.* (2016) A structural ensemble of a ribosome-nascent chain complex during cotranslational protein folding. *Nat Struct Mol Biol* 23:278-285.
17. Goldman DH, *et al.* (2015) Mechanical force releases nascent chain-mediated ribosome arrest *in vitro* and *in vivo*. *Science* 348:457-460.

Supplementary Figures S1-S3

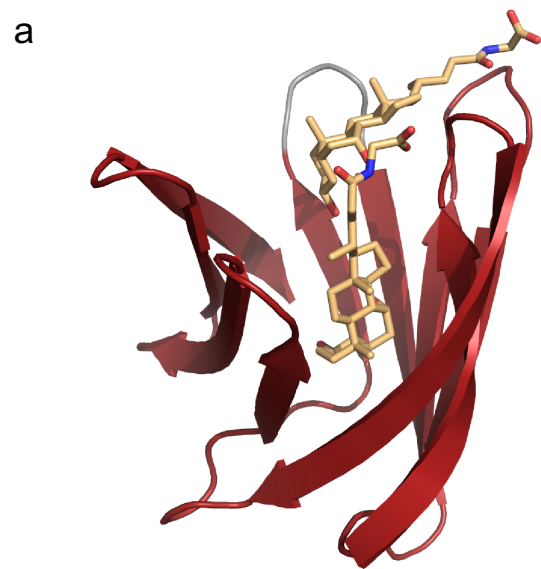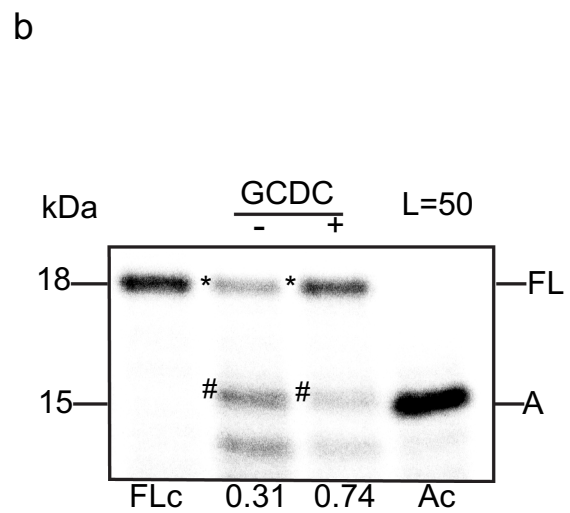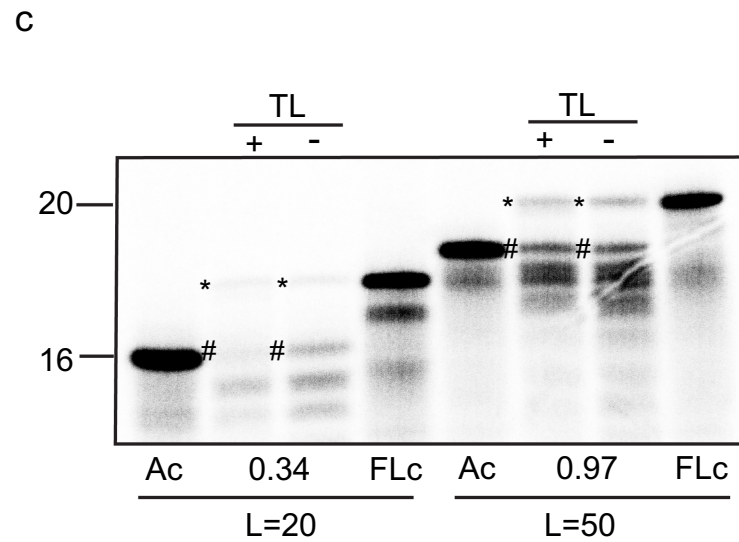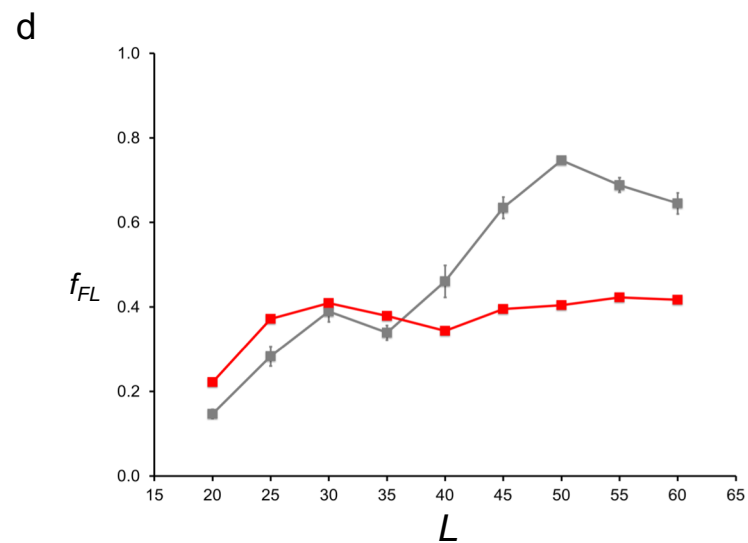

*Supplementary Figure S1, continued.* (a) Model for a loop-truncated ILBP mutant used to test the effects of ligand binding on the  $f_{FL}$  profile. The model is based on PDB 2lba, the modeling template showed 60 % sequence identity with the modeled targets and the position of the ligand reflects an estimation of the position in the modeled using as reference the position in the NMR structure. Biochemical data supports the binding of this ligand in all versions of the protein used for this study [17]. (b) *In vitro* translation of the loop-truncated ILBP[L=50] construct with the SecM(*Ms*) AP, showing that the protein exerts a stronger pulling force on the nascent chain in the presence (+) than in the absence (-) of the ligand GCDC ( $f_{FL} = 0.74$  vs. 0.31;  $f_{FL} = I_{FL}/(I_{FL}+I_A)$  where  $I_{FL}$  (or  $I_A$ ) is the intensity of the band marked \* (or #). Full-length (FLc) and arrested (Ac) controls are indicated; the FLc construct has a P-to-A mutation the critical Pro at the end of the AP and does not give any arrested product, the Ac construct has a stop codon inserted directly after the AP. (c) *In vitro* translation and pulse proteolysis of wildtype ILBP at  $L = 20$  and  $L = 50$  residues. The arrested ILBP nascent chain is susceptible to thermolysin at  $L = 20$  residues ( $f_{TR} = 0.34$ ) but not at  $L = 50$  residues ( $f_{TR} = 0.97$ ), compare bands marked # in the  $\pm$ TL lanes. Full length (FLc) and arrested (Ac) controls are indicated. (d)  $f_{FL}$  profiles for loop-truncated ILBP (red curve) and loop-truncated ILBP translated in the presence of 400  $\mu$ M of the ligand glycochenodeoxycholic acid (GCDC; grey curve).

WT MRRYEVNIVLNPNDQSQUAL EKE I IQRAL ENYGARV EKV EELGLRR LAYP  
 +16-9 MRRYEVNIVLNPNDQSQUAL EKQ I IQRAL ENYGARV QKVQ ELGLRR LAYP  
 0 MSSYQVNIVLNPNLNQSQUALQSQ I IQSALQNYGASVQSVQQLGLSSLAYP  
 +9-16 MSRYEVNIVLNPNDQSQUAL ESE I IQRAL ENYGARV ESV EELGLSR LAYP  
 -16 MSSYEVNIVLNPNDQSQUAL ESE I IQSAL ENYGASV ESV EELGLSSLAYP

WT IAKDPQGYFLWYQVEMPEDRVNDLARELRIRDNVRRVMVVKSQEPFLANA  
 +16-9 IAKDPQGYFLWYQVEMPQNRVNDLARQLRIRNNVRRVMVVKSQEPFLANA  
 0 IASNPQGYFLWYQVQMPQNSVNNLASQLSISNNVSSVMVSSSQQPFLANA  
 +9-16 IAKDPQGYFLWYQVEMPEDRVNDLASELRISDNVRSVMVVKSQEPFLANA  
 -16 IASDPQGYFLWYQVEMPEDSVNDLASELSISDNVSSVMVSSSQEPFLANA

*Supplementary Figure S2.* Sequences of the protein S6 charge variants analyzed in Figure 4.

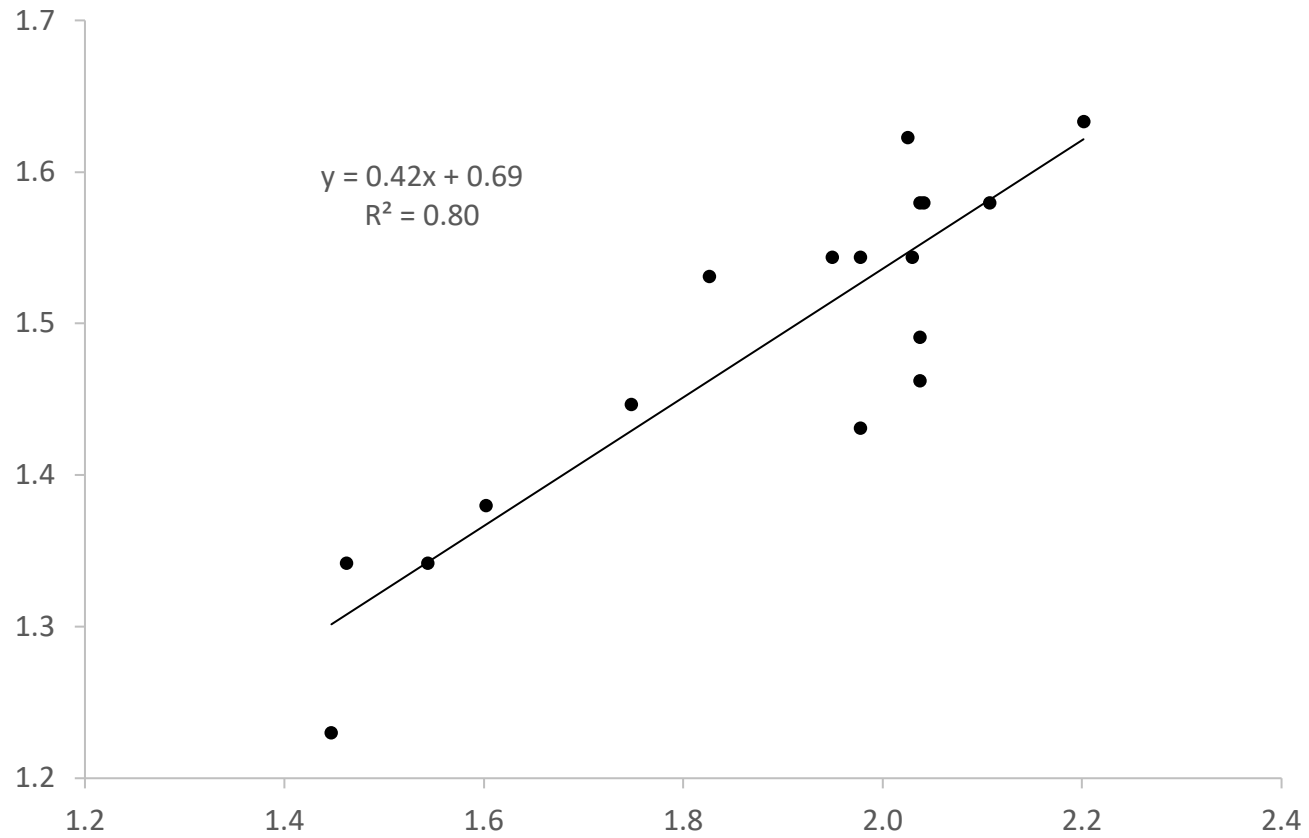

Supplementary Figure S3. Scatter plot and linear fit of  $\log_{10}(L_{onset})$  vs  $\log_{10}(size)$
